# Supplementary material for: Structural studies of Enterococcus faecalis methionine aminopeptidase and design of microbe specific 2,2′-bipyridine based inhibitors
Source: Royal Society of Chemistry journal article supplement (doi:10.1039/c2md20096a), 2012-01-01
Supplement: c2md20096a.pdf [file c2md20096a.pdf]

## Supplementary material:

**Purification of *EfMetAP*:** C-terminus penta-his tagged 30 KDa *EfMetAP* was expressed and purified from BL21 (DE3) *E. coli* strain. More than 95% pure protein was obtained from the single nickel affinity column judged by coomassie blue-stained SDS-polyacrylamide gel.

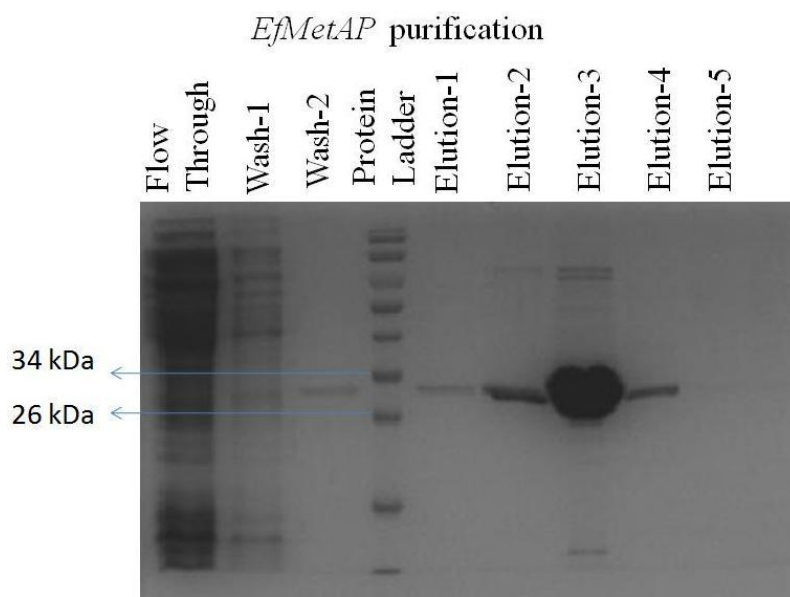

**Supplementary Figure 1.** Purification of PolyHis-tagged *EfMetAP* (~30 kDa).

### Buffer pH Vs Metal ions variation

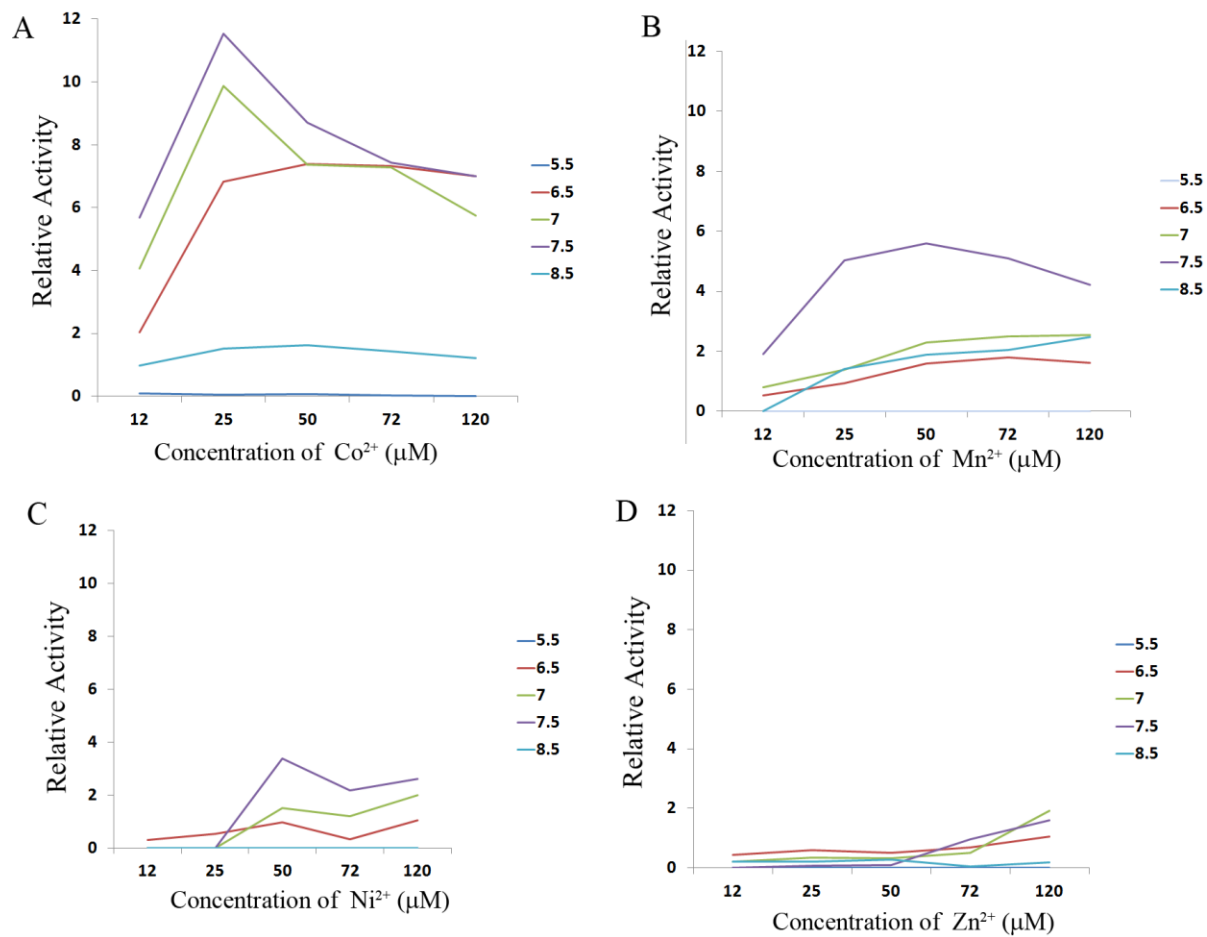

Supplementary Figure 2. Activity of *EfmMetAP* with pH and Metal ions variation

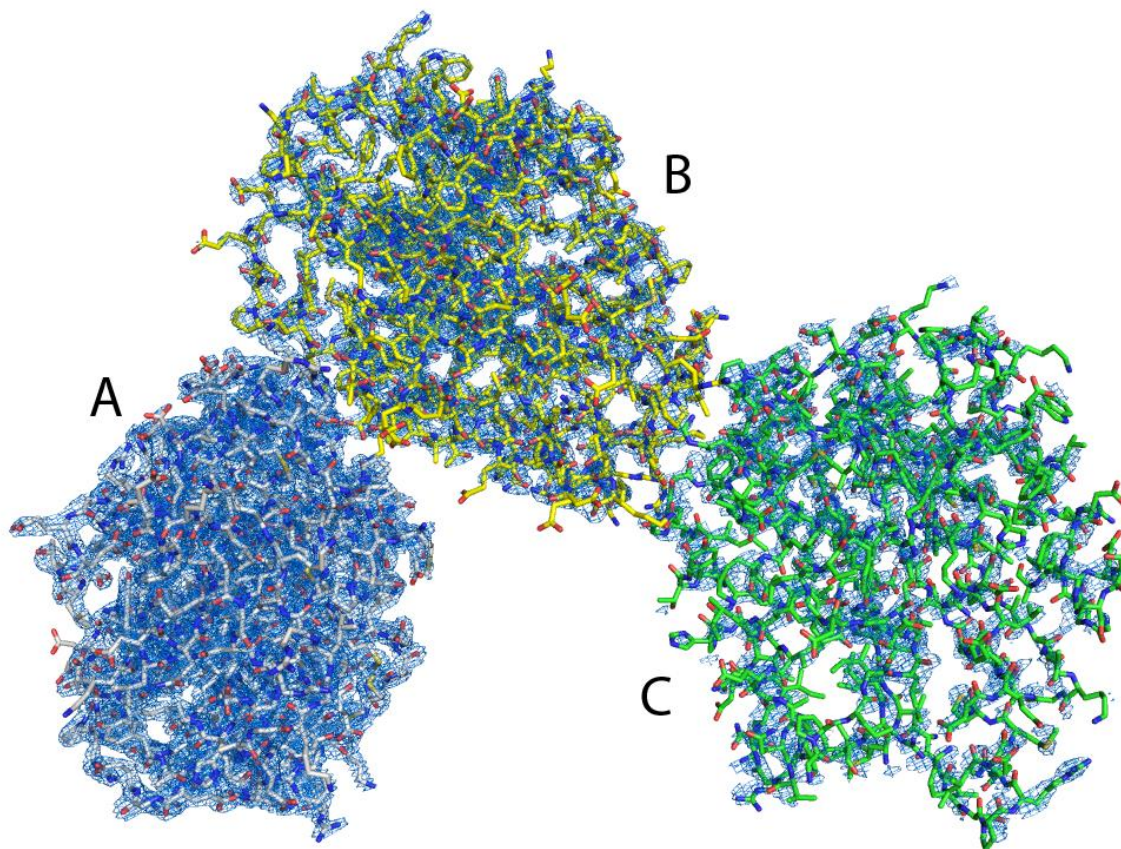

**Supplementary Figure 3.** Crystal structure of *EfMetAP* at 2.3 Å with three molecules in the asymmetric unit ( $2F_o-2F_c$  electron density contoured at  $1.5\sigma$ ). Molecule A, B and C represented by white, yellow and green sticks respectively. Good density was observed for all residues in molecules A and B while parts of the molecule C could not be traced.

## Virtual Screening

Virtual screening of 126 bipyridine derivatives was carried against *EfmetAP* and *HsMetAp* to find out microbes specific inhibitor. Two molecules have good hit against *EfMetAP*.

| Compound Id | R1  | R2 | R3                                                                                 | R4                                                                                  | Binding energy with <i>EfMetAP</i> (kcal/mol) | Binding energy with <i>HsMetAP</i> (kcal/mol) |
|-------------|-----|----|------------------------------------------------------------------------------------|-------------------------------------------------------------------------------------|-----------------------------------------------|-----------------------------------------------|
| 1           | OH  | H  | 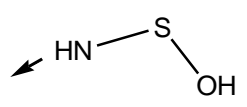  |   | -8.0                                          | -7.2                                          |
| 2           | NH2 | H  |  |  | -8.1                                          | -7.0                                          |

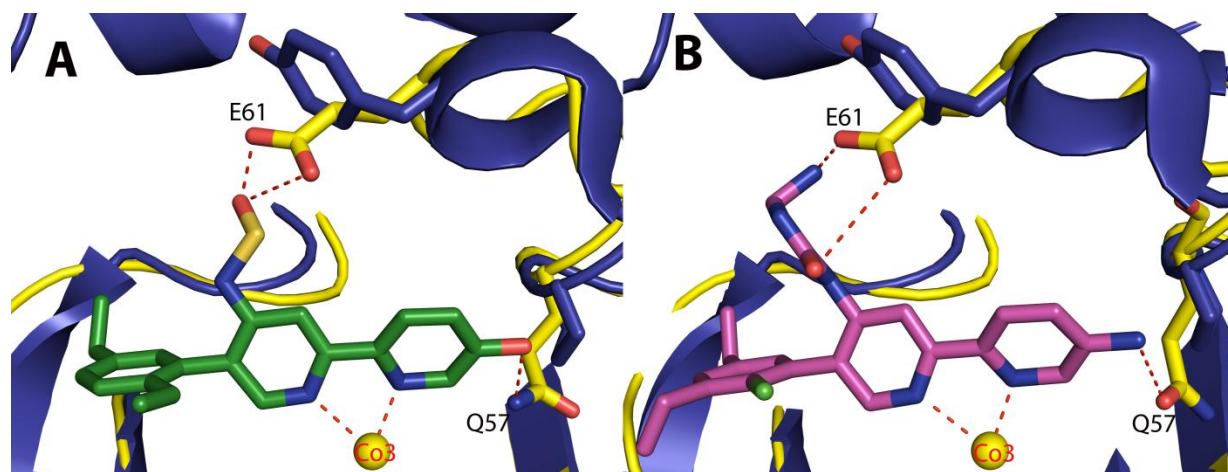

**Supplementary Figure 4.** possible binding mode of bipyridine derivatives with *EfMetAP*.

Yellow cartoon represent *EfMetAP*, while blue cartoon represents *HsMetAP*. (A) Interaction of compound 1 and (B) compound 2 with *EfMetAP*.
